# Supplementary material
Source: Springer Nature journal article supplement (https://www.springermedizin.de/resource/supplementary/13014_2013_921_MOESM1_ESM.pdf/9634408)

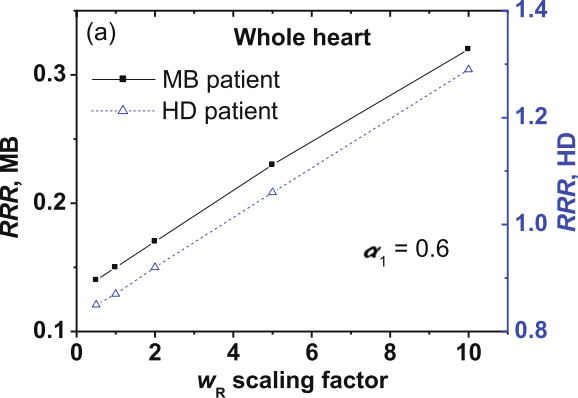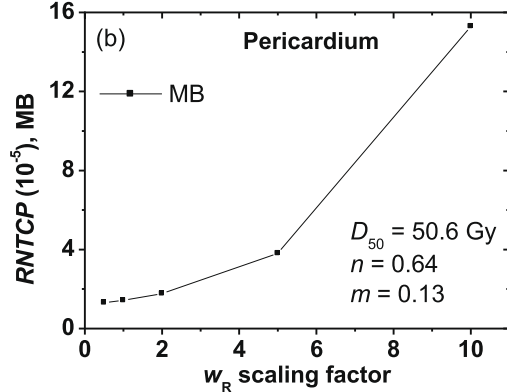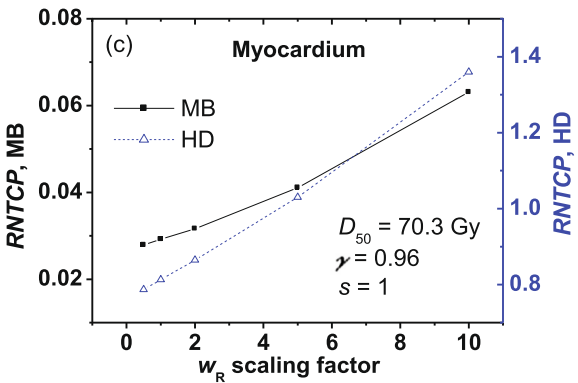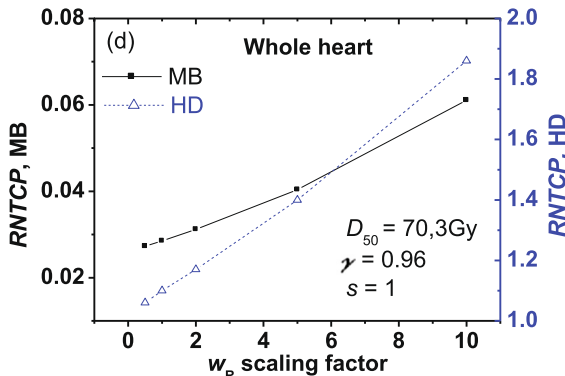

Supplement: MOESM1 [file 9634408]
